# Supplementary material for: CdII/ZnIIdiscrimination using 2,5-diphenyl[1,3,4]oxadiazole based fluorescent chemosensors
Source: Royal Society of Chemistry journal article supplement (doi:10.1039/c8nj00113h), 2018-01-01
Supplement: c8nj00113h1.pdf [file c8nj00113h1.pdf]

New Journal of Chemistry  
Electronic Supplementary Information  
to

**Cd<sup>II</sup>/Zn<sup>II</sup> discrimination by 2,5-diphenyl[1,3,4]oxadiazole based  
fluorescent chemosensors**

Mauro Formica,<sup>a</sup> Gianluca Ambrosi,<sup>a</sup> Vieri Fusi,<sup>a\*</sup> Luca Giorgi,<sup>a\*</sup> Massimiliano Arca,<sup>b</sup> Alessandra Garau,<sup>b</sup> Anna Pintus,<sup>b</sup> Vito Lippolis<sup>b</sup>

*<sup>a</sup>Department of Pure and Applied Sciences, University of Urbino, P.zza Rinascimento 6, I-61029 Urbino, Italy. Tel/Fax: +39-0722-304884. Email: [luca.giorgi@uniurb.it](mailto:luca.giorgi@uniurb.it)*

*<sup>b</sup>Dipartimento di Scienze Chimiche e Geologiche, Università degli Studi di Cagliari, S.S. 554 Bivio per Sestu, 09042 Monserrato (CA), Italy*

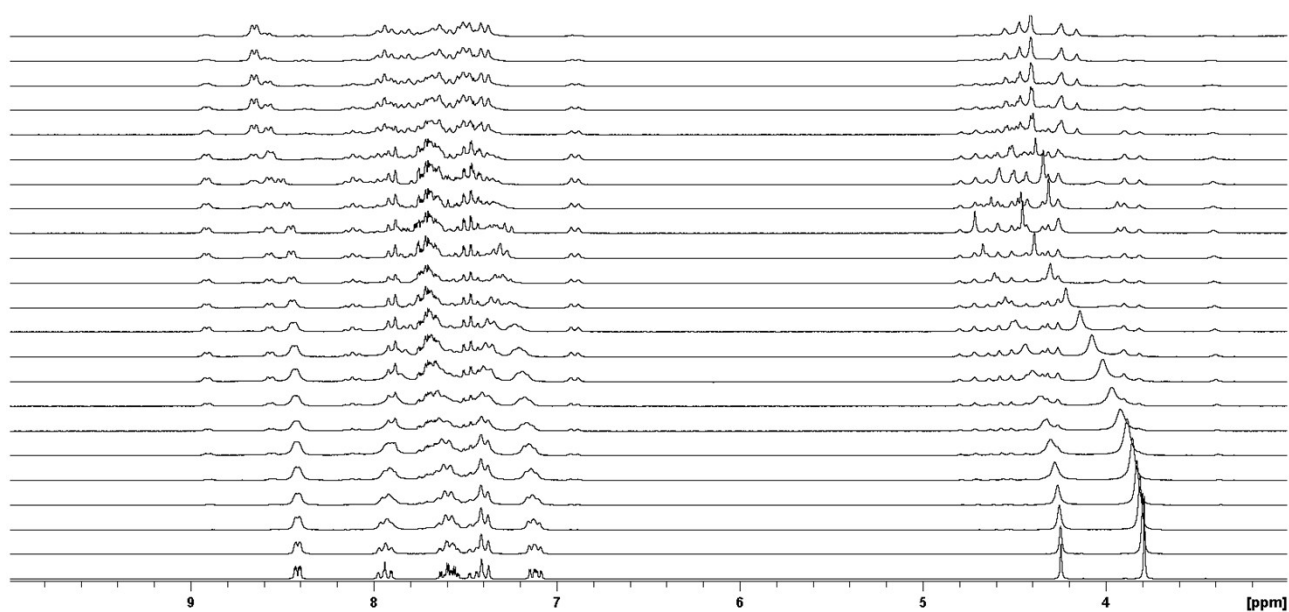

**Figure S1.**  $^1\text{H}$ -NMR titration of **L1** in  $\text{CD}_3\text{CN}$  at 298.1 K obtained by adding several amounts of  $\text{Zn}(\text{ClO}_4)_2$  to a **L1** ( $1.0 \cdot 10^{-2} \text{ mol} \cdot \text{dm}^{-3}$ ) solution.

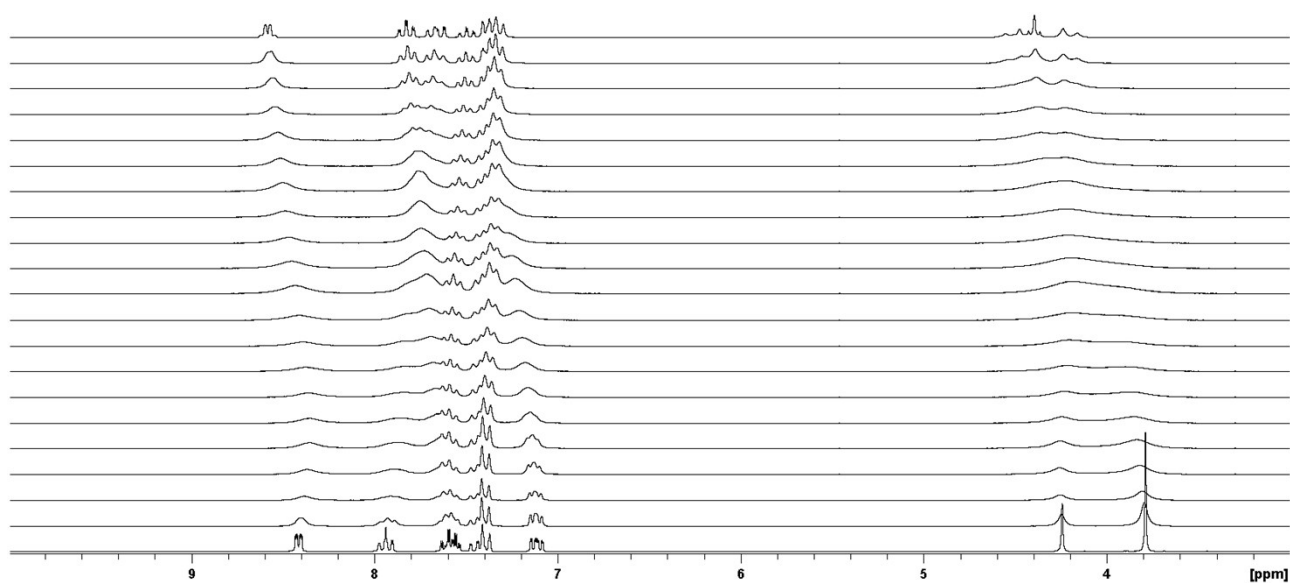

**Figure S2.** <sup>1</sup>H-NMR titration of **L1** in in CD<sub>3</sub>CN at 298.1 K obtained by adding several amounts of Cd(ClO<sub>4</sub>)<sub>2</sub> to a **L1** ( $1.0 \cdot 10^{-2} \text{ mol} \cdot \text{dm}^{-3}$ ) solution.

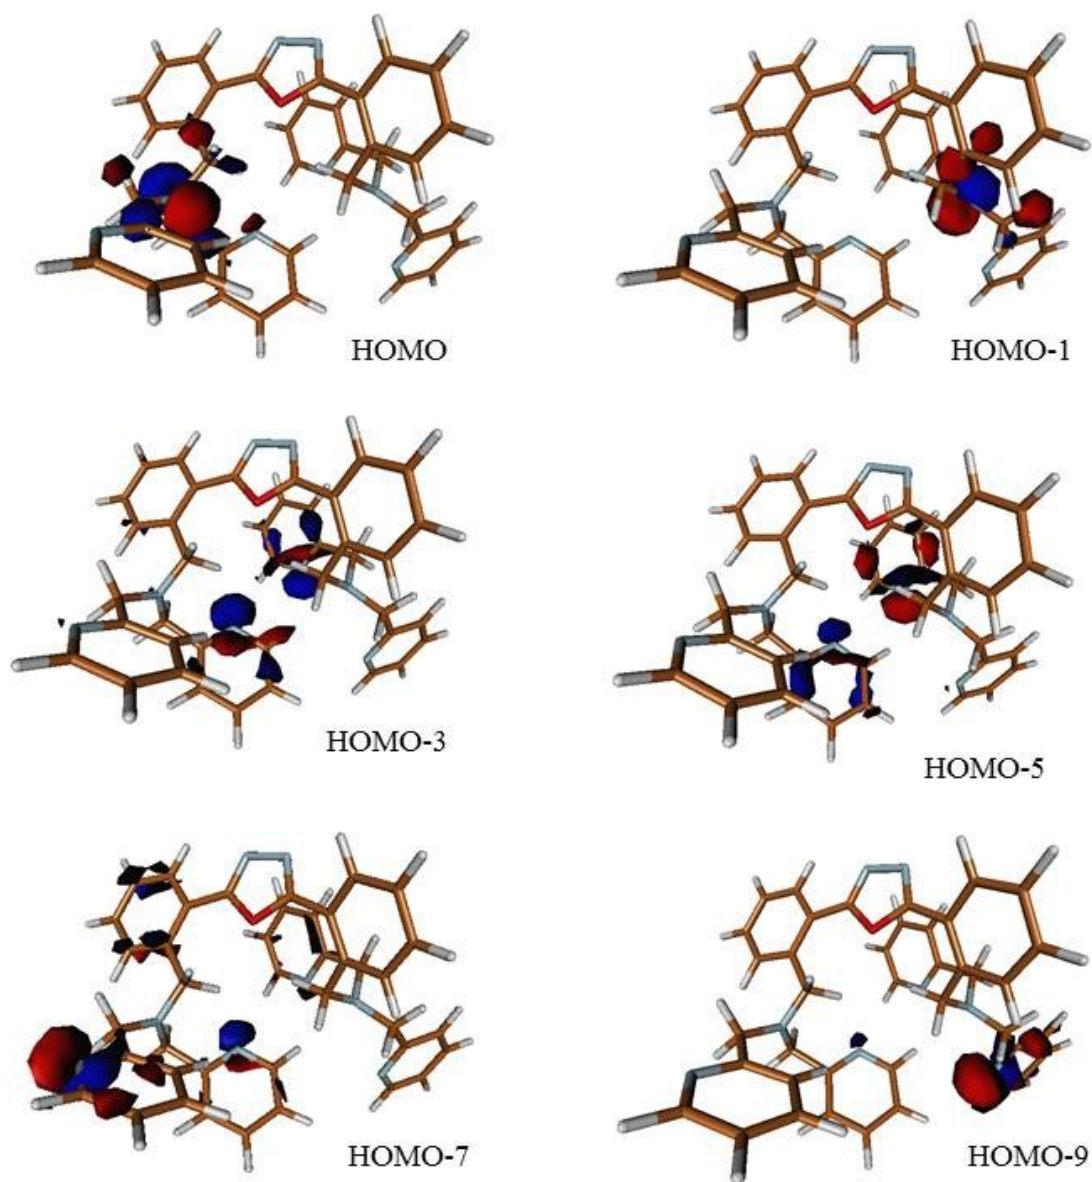

**Figure S3.** Selected KS-orbital drawings calculated for **L1** at the DFT level. Contour value= 0.05 e.

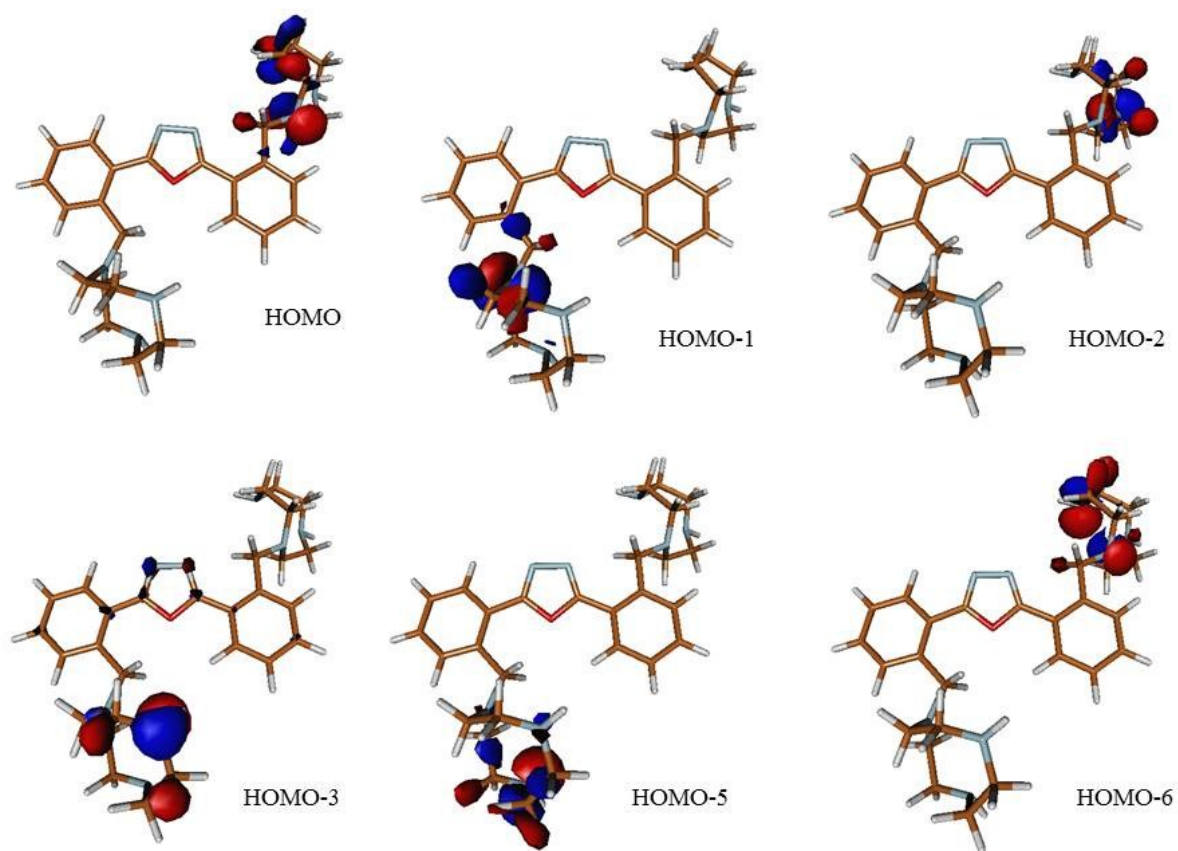

**Figure S4.** Selected KS-orbital drawings calculated for **L2** at the DFT level. Contour value= 0.05 e.
